# Supplementary material for: An integrative strategy for quantitative analysis of the N-glycoproteome in complex biological samples
Source: PubMed Central journal article supplement (PMC3923275; doi:10.1186/1477-5956-12-4), 2014-01-15
Supplement: 1477-5956-12-4-S4.pdf [file 1477-5956-12-4-S4.pdf]

**Additional file 4: The number of differently expressed glycoproteins/glycopeptides between HCC patients and healthy individuals in the three lectin subgroups.** The data calculated by self-build quantitative method.

| <b>Lectin subgroup</b> | <b>Changed glycoprotein</b> | <b>Significantly changed glycoprotein</b> | <b>Changed glycopeptide</b> | <b>Significantly changed glycopeptide</b> |
|------------------------|-----------------------------|-------------------------------------------|-----------------------------|-------------------------------------------|
| ConA                   | 17                          | 14                                        | 26                          | 21                                        |
| LCH                    | 8                           | 5                                         | 12                          | 7                                         |
| WGA                    | 5                           | 4                                         | 6                           | 4                                         |
