# Supplementary material for: An integrative strategy for quantitative analysis of the N-glycoproteome in complex biological samples
Source: PubMed Central journal article supplement (PMC3923275; doi:10.1186/1477-5956-12-4), 2014-01-15
Supplement: 1477-5956-12-4-S5.pdf [file 1477-5956-12-4-S5.pdf]

**Additional file 5: The table of changed glycopeptides in HCC patient serum (<sup>18</sup>O Labeling) compared to health control (<sup>16</sup>O Labeling). \* denotes the N-glycosylation site.**

| Lectin subgroup | Swiss-Prot | Protein name | Entry | Peptide Sequence         | N-sites  | Peptide Position | <sup>18</sup> O/ <sup>16</sup> O Ratio | SD   |
|-----------------|------------|--------------|-------|--------------------------|----------|------------------|----------------------------------------|------|
| ConA            | P04114     | APOB_HUMAN   |       | FVEGSHN*STVSLTTK         | 3411     | 3405-3419        | 0.093                                  | 0.01 |
| ConA            | P01860     | IGHG3_HUMA   |       | EEQYN*STFR               | 227      | 223-231          | 0.281                                  | 0.05 |
| ConA            | Q6S9Z5     | ZN474_HUMA   |       | HSN*SSDHLTGLK            | 200      | 198-209          | 0.438                                  | 0.16 |
| ConA            | P01877     | IGHA2_HUMA   |       | SVTWSESGQN*VTAR          | 47       | 38-51            | 0.518                                  | 0.04 |
| ConA            | P04114     | APOB_HUMAN   |       | SN*ASSTDSASYPLTGDR       | 983      | 982-1000         | 0.714                                  | 0.13 |
| ConA            | P04004     | VTNC_HUMAN   |       | NN*ATVHEQVGGPSLTSDLQAQSK | 86       | 85-107           | 0.761                                  | 0.11 |
| ConA            | P01857     | IGHG1_HUMA   |       | EEQYN*STYR               | 180      | 176-184          | 0.809                                  | 0.03 |
| ConA            | P05090     | APOD_HUMAN   |       | ADGTVNQIEGEATPVN*LTEPAK  | 98       | 83-104           | 0.828                                  | 0.07 |
| ConA            | P04114     | APOB_HUMAN   |       | FN*SSYLQGTNQITGR         | 1523     | 1522-1536        | 1.384                                  | 0.36 |
| ConA            | Q08380     | LG3BP_HUMA   |       | ALGFEN*ATQALGR           | 69       | 64-76            | 1.638                                  | 0.55 |
| ConA            | P04114     | APOB_HUMAN   |       | FEVDSPVYN*ATWSASLK       | 3895     | 3887-3903        | 1.695                                  | 0.07 |
| ConA            | P02751     | FINC_HUMAN   |       | LDAPTNLQFVN*ETDSTVLVR    | 1007     | 997-1016         | 1.802                                  | 0.08 |
| ConA            | P10909     | CLUS_HUMAN   |       | LAN*LTQGEDQYYLR          | 374      | 372-385          | 1.840                                  | 0.04 |
| ConA            | P04278     | SHBG_HUMAN   |       | LDVDQALN*R               | 380      | 373-381          | 2.203                                  | 0.28 |
| ConA            | P02675     | FIBB_HUMAN   |       | ALMDGASQLMGEN*R          | 394      | 382-395          | 2.366                                  | 0.03 |
| ConA            | P0C0L5     | CO4B_HUMAN   |       | FSDGLESN*SSTQFEVK        | 226      | 219-234          | 2.545                                  | 0.09 |
| ConA            | P02675     | FIBB_HUMAN   |       | LMDGASQLMGEN*R           | 394      | 383-395          | 2.771                                  | 0.17 |
| ConA            | P07357     | CO8A_HUMAN   |       | GGSSGWSGGLAQN*R          | 437      | 425-438          | 2.800                                  | 0.63 |
| ConA            | P0C0L4     | CO4A_HUMAN   |       | GLN*VTLSSSTGR            | 1328     | 1326-1336        | 3.015                                  | 0.07 |
| ConA            | P04220     | MUCB_HUMA    |       | THTN*ISESHPN*ATFS        | 210, 217 | 207-221          | 3.087                                  | 0.11 |
| ConA            | P02675     | FIBB_HUMAN   |       | DGASQLMGEN*R             | 394      | 385-395          | 3.270                                  | 0.29 |
| ConA            | P02675     | FIBB_HUMAN   |       | GTAGNALMDGASQLMGEN*R     | 394      | 377-395          | 3.615                                  | 0.50 |
| ConA            | P02675     | FIBB_HUMAN   |       | MDGASQLMGEN*R            | 394      | 384-395          | 4.044                                  | 0.20 |
| ConA            | P10909     | CLUS_HUMAN   |       | QLEEFNL*QSSPF            | 145      | 139-150          | 6.057                                  | 0.25 |
| ConA            | P07996     | TSP1_HUMAN   |       | VVN*STTGPEHLR            | 1067     | 1065-1077        | 7.344                                  | 0.10 |
| ConA            | P55056     | APOC4_HUMA   |       | ELLETVVN*R               | 63       | 56-64            | 11.410                                 | 0.57 |
| LCH             | P55058     | PLTP_HUMAN   |       | MLQITN*ASLGLR            | 94       | 89-100           | 0.168                                  | 0.32 |
| LCH             | P05090     | APOD_HUMAN   |       | QIEGEATPVN*LTEPAK        | 98       | 89-104           | 0.212                                  | 0.08 |
| LCH             | Q08380     | LG3BP_HUMA   |       | ALGFEN*ATQALGR           | 69       | 64-76            | 0.612                                  | 0.03 |
| LCH             | P01857     | IGHG1_HUMA   |       | EEQYN*STYR               | 180      | 176-184          | 0.639                                  | 0.03 |
| LCH             | P00450     | CERU_HUMAN   |       | EHEGAIYPDN*TTDFQR        | 138      | 129-144          | 0.816                                  | 0.10 |
| LCH             | P33151     | CADH5_HUMA   |       | EVYPWYN*LTVEAK           | 442      | 436-448          | 0.834                                  | 0.16 |
| LCH             | P08603     | CFAH_HUMAN   |       | SQPPQIEHGNTIN*SSR        | 882      | 871-885          | 0.836                                  | 0.08 |
| LCH             | O75636     | FCN3_HUMAN   |       | VELEDFNGN*R              | 189      | 171-190          | 1.304                                  | 0.04 |
| LCH             | P04220     | MUCB_HUMA    |       | THTNISESHPN*ATFS         | 217      | 207-221          | 1.702                                  | 0.06 |
| LCH             | P04220     | MUCB_HUMA    |       | THTNISESHPN*ATFSAVG      | 217      | 207-224          | 4.998                                  | 0.13 |
| LCH             | P04220     | MUCB_HUMA    |       | GLTFQQN*ASSMCGPDQDTAIRV  | 147      | 141-162          | 8.834                                  | 0.06 |
| LCH             | P05090     | APOD_HUMAN   |       | ADGTVNQIEGEATPVN*LTEPAK  | 98       | 83-104           | 9.852                                  | 0.28 |
| WGA             | Q96QU1     | PCD15_HUMA   |       | QMLFLN*STGR              | 97       | 92-101           | 0.480                                  | 0.04 |
| WGA             | Q9H9A7     | RMI1_HUMAN   |       | FSHNPN*TTNN              | 357      | 352-361          | 39.27                                  | 0.04 |
| WGA             | Q01081     | U2AF1_HUMA   |       | KVN*CSFYFK               | 17       | 15-23            | 0.500                                  | 0.02 |
| WGA             | P10909     | CLUS_HUMAN   |       | LAN*LTQGEDQYYLR          | 374      | 372-385          | 1.198                                  | 0.06 |
| WGA             | P04004     | VTNC_HUMAN   |       | NN*ATVHEQVGGPSLTSDLQAQSK | 86       | 85-107           | 1.407                                  | 0.02 |
| WGA             | P0C0L4     | CO4A_HUMAN   |       | GLN*VTLSSSTGR            | 1328     | 1326-1336        | 2.510                                  | 0.26 |
