# Supplementary material for: An integrative strategy for quantitative analysis of the N-glycoproteome in complex biological samples
Source: PubMed Central journal article supplement (PMC3923275; doi:10.1186/1477-5956-12-4), 2014-01-15
Supplement: 1477-5956-12-4-S10.pdf [file 1477-5956-12-4-S10.pdf]

**Additional file 10: Physiological/pathological characteristics of patients and healthy individuals enrolled in this study.**

| physiological/pathological variable | HCC patients (n=3) | Healthy individuals (n=3) |
|-------------------------------------|--------------------|---------------------------|
| Gender                              |                    |                           |
| Male                                | 3                  | 3                         |
| Female                              | 0                  | 0                         |
| Age (years)                         |                    |                           |
| 40-50                               | 3                  | 3                         |
| >50                                 | 0                  | 0                         |
| Weight (kg)                         |                    |                           |
| 51-60                               | 0                  | 0                         |
| 61-70                               | 2                  | 2                         |
| 71-80                               | 1                  | 1                         |
| Smoking history                     |                    |                           |
| Yes                                 | 0                  | 0                         |
| No                                  | 3                  | 3                         |
| Drinking alcohol hobby              |                    |                           |
| Yes                                 | 0                  | 0                         |
| No                                  | 3                  | 3                         |
| Child-Pugh                          |                    |                           |
| A                                   | 3                  | 3                         |
| B                                   | 0                  | 0                         |
| C                                   | 0                  | 0                         |
| Tumor size (cm)                     |                    |                           |
| ≤2                                  | 3                  | 0                         |
| > 2                                 | 0                  | 0                         |
| BCLC stage                          |                    |                           |
| 0                                   | 3                  | N                         |
| A                                   | 0                  | N                         |
| B                                   | 0                  | N                         |

The Child-Pugh system classifies the liver function from A to C, with A representing the best liver function. BCLC denotes Barcelona Clinic Liver Cancer staging system, which ranks hepatocellular carcinoma in five stages, ranging from 0 (very early stage) to D (terminal stage).
